# Supplementary material for: Anti‐PD‐1 therapy redirects macrophages from an M2 to an M1 phenotype inducing regression of OS lung metastases
Source: PubMed Central journal article supplement (PMC6010882; doi:10.1002/cam4.1518), 2018-05-07

PBS

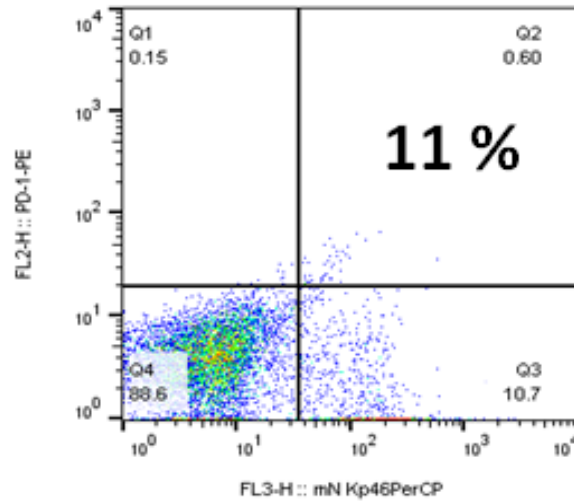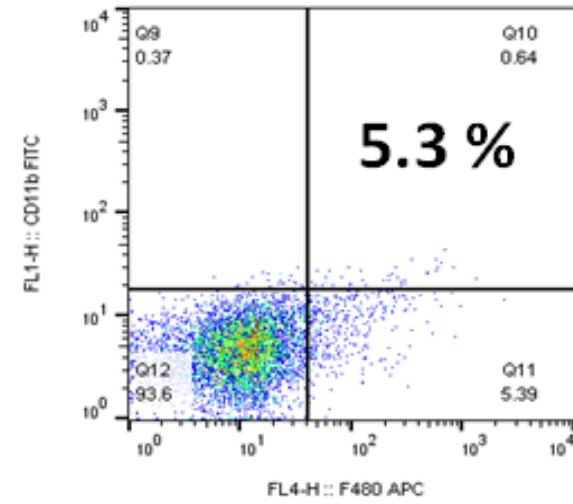

Anti-asialo-GM1

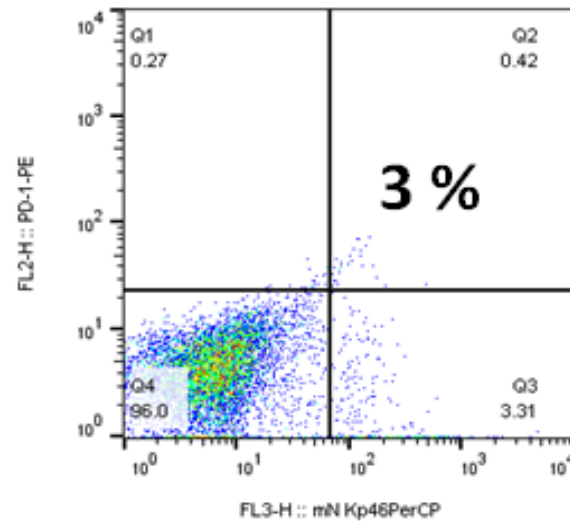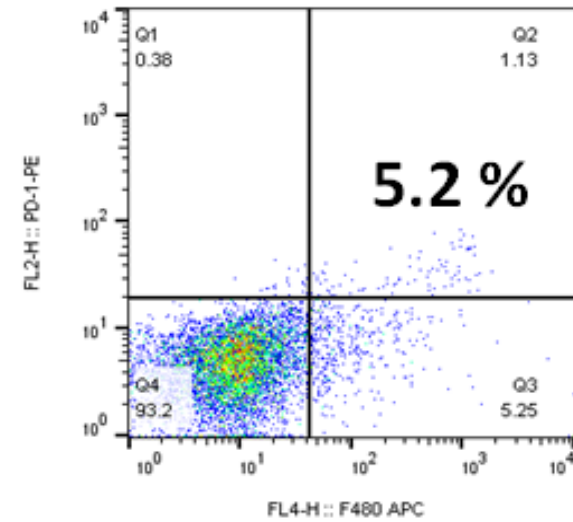

Supplement: CAM4-7-2654-s005.pdf [file CAM4-7-2654-s005.pdf]
